# Supplementary material for: Clinical Application of Ultraviolet C Inactivation of Severe Acute Respiratory Syndrome Coronavirus 2 in Contaminated Hospital Environments
Source: MDPI journal article supplement (doi:10.3390/v13122367), 2021-11-26
Supplement: s1 [file s1]

# Clinical Application of Ultraviolet C Inactivation of Severe Acute Respiratory Syndrome Coronavirus 2 in Contaminated Hospital Environments

Table S1. The dosage effect of 254 nm UVC radiation on different time.

| CtV = 13, n = 12                 | Control  | Irradiation for 15 min | Irradiation for 20 min | Irradiation for 30 min | p-value            |
|----------------------------------|----------|------------------------|------------------------|------------------------|--------------------|
| Positive rate, n (%)             | 5 (42)   | 0 (0)                  | 1 (8)                  | 0 (0)                  | 0.005 <sup>a</sup> |
| human <i>RNAse P</i> gene, n (%) | 5 (42)   | 1 (8)                  | 2 (17)                 | 1 (8)                  | 0.118 <sup>b</sup> |
| CtV, mean±SE                     | 33.2±1.9 | 32.2                   | 34.9±1.2               | 32.8                   | 0.928              |
| <i>E</i> gene, n (%)             | 1 (8)    | 0 (0)                  | 0 (0)                  | 0 (0)                  | 0.382 <sup>c</sup> |
| CtV, mean±SE                     | 29.5     | NA                     | NA                     | NA                     | NA                 |
| <i>N</i> gene, n (%)             | 5 (42)   | 0 (0)                  | 1 (8)                  | 0 (0)                  | 0.005 <sup>d</sup> |
| CtV, mean±SE                     | 32.9±1.4 | NA                     | 34.2                   | NA                     | 0.720              |
| <i>RdRP</i> gene, n (%)          | 2 (17)   | 0 (0)                  | 0 (0)                  | 0 (0)                  | 0.100 <sup>e</sup> |
| CtV, mean±SE                     | 32.1±3.4 | NA                     | NA                     | NA                     | NA                 |

UVC, ultraviolet C; CtV, cycle threshold value; SE, standard error; NA, not applicable. The categorical variables are presented as n (%), n: presented as the number of positive results of environmental sampling, (%): presented as the percentage of positive rate. The continuous variables are presented as mean ± SE. a.-p = 0.001 significance for Linear trend, dose effect b.-p = 0.031 significance for Linear trend, dose effect. c.-p = 0.109. d.-p = 0.001 significance for Linear trend, dose effect. e.-p = 0.022 significance for Linear trend, dose effect.

Table S2. The 254 nm irradiation on washbasin.

| CtV = 18, n = 4           | A     | B     | C     | D   |
|---------------------------|-------|-------|-------|-----|
| Before irradiation        | +     | –     | +     | –   |
| human <i>RNAse P</i> gene | +     | –     | +     | –   |
| CtV                       | 28.86 | NA    | 28.16 | NA  |
| <i>E</i> gene             | +     | –     | +     | –   |
| CtV                       | 34.53 | NA    | 32.47 | NA  |
| <i>N</i> gene             | +     | –     | +     | –   |
| CtV                       | 31.55 | NA    | 29.16 | NA  |
| <i>RdRP</i> gene          | –     | –     | –     | –   |
| Bleach Tx                 | No    | No    | Yes   | Yes |
| UVC 15 min                | –     | –     | –     | –   |
| human <i>RNAse P</i> gene | –     | +     | –     | –   |
| CtV                       | NA    | 35.22 | NA    | NA  |
| <i>E</i> gene             | –     | –     | –     | –   |
| <i>N</i> gene             | –     | –     | –     | –   |
| <i>RdRP</i> gene          | –     | –     | –     | –   |
| UVC 20 min                | –     | –     | –     | –   |
| human <i>RNAse P</i> gene | +     | –     | –     | –   |
| CtV                       | 36.1  | NA    | NA    | NA  |
| <i>E</i> gene             | –     | –     | –     | –   |
| <i>N</i> gene             | –     | –     | –     | –   |
| <i>RdRP</i> gene          | –     | –     | –     | –   |
| UVC 30 min                | –     | –     | –     | –   |
| human <i>RNAse P</i> gene | +     | –     | –     | –   |
| CtV                       | 34.2  | NA    | NA    | NA  |

|                  |   |   |   |   |
|------------------|---|---|---|---|
| <i>E</i> gene    | – | – | – | – |
| <i>N</i> gene    | – | – | – | – |
| <i>RdRP</i> gene | – | – | – | – |

---

CtV, cycle threshold value; UVC, ultraviolet C; NA, not applicable. Bleach cleaning was done on position C and D. +, any SARS-CoV-2 gene was detected; –, none of SARS-CoV-2 gene was detected.
